# Supplementary material for: Independent Stage Classification for Gastroesophageal Junction Adenocarcinoma
Source: MDPI journal article supplement (doi:10.3390/cancers15215137), 2023-10-25

**Supplemental Figure S1.** Survival curve by gross ypTN group.

A. Upper and middle esophagus

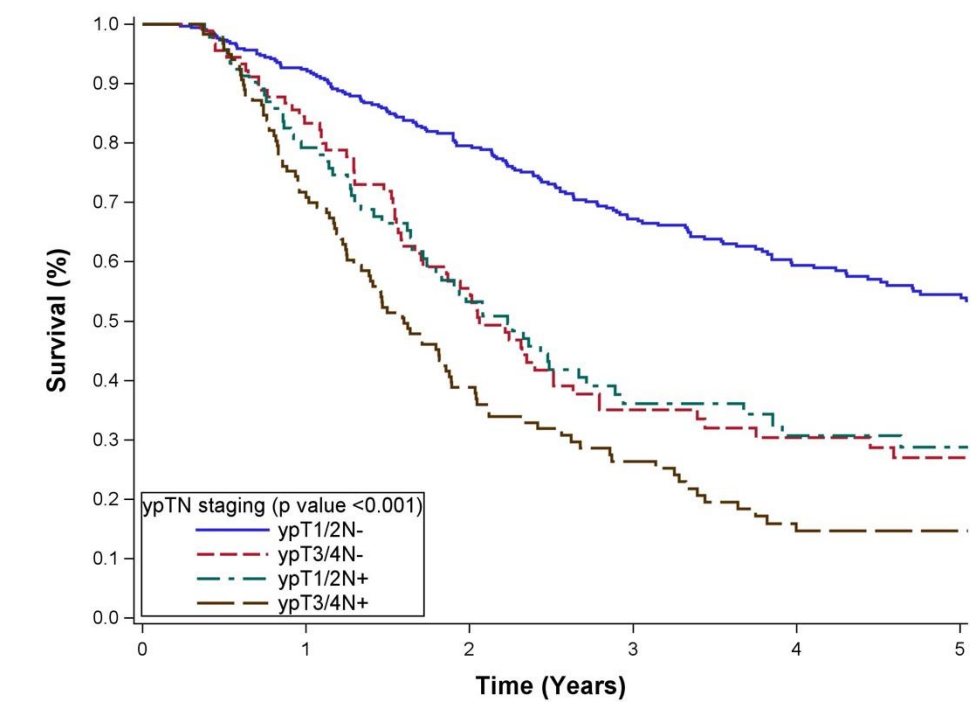

B. Lower esophagus

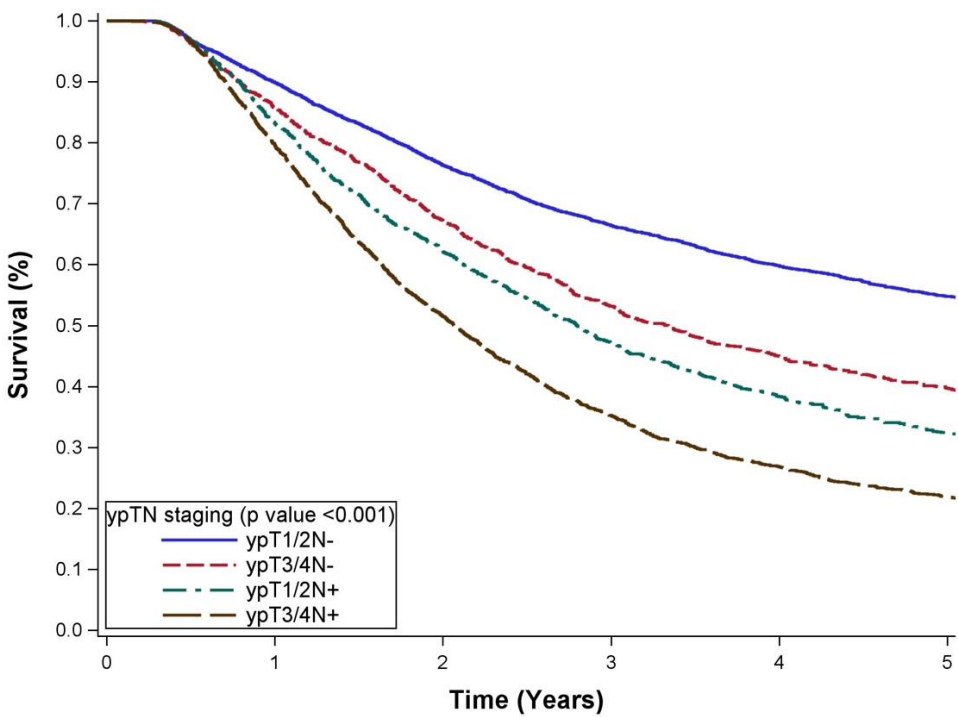

### C. Gastric cardia

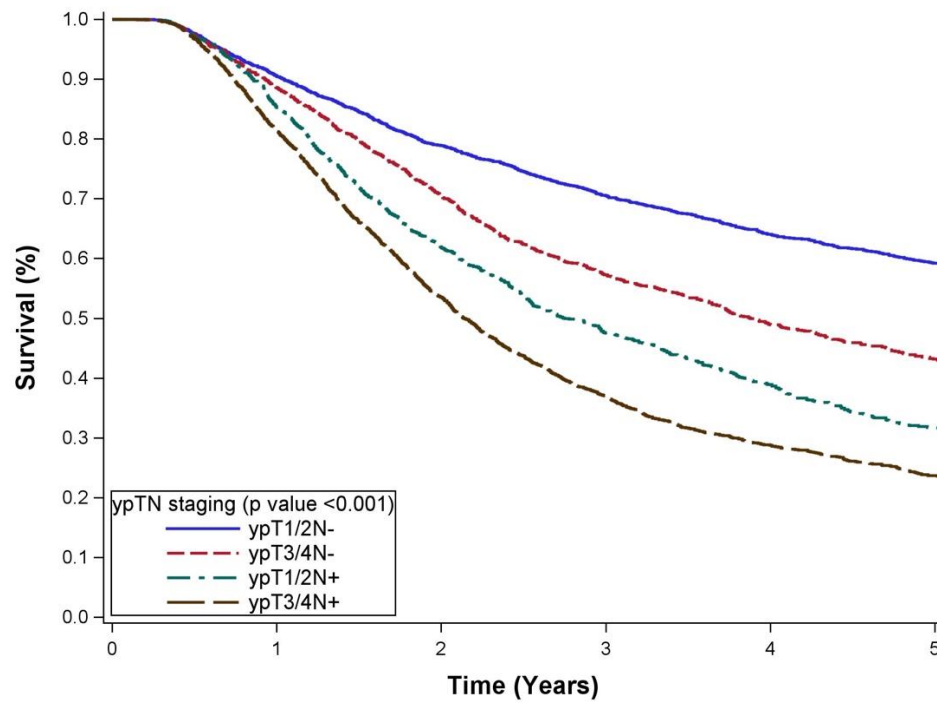

### D. Other stomach

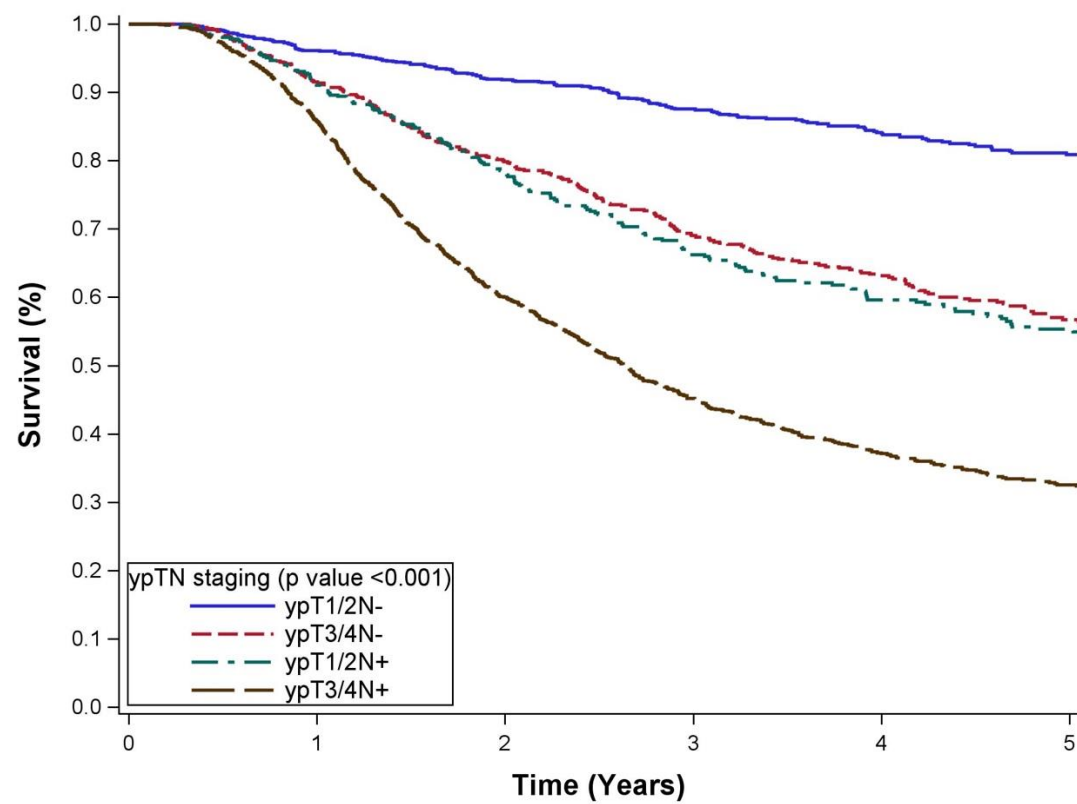

Supplement: s1 [file s1]
